# Supplementary material for: Using structural knowledge in the protein data bank to inform the search for potential host-microbe protein interactions in sequence space: application to Mycobacterium tuberculosis
Source: PubMed Central journal article supplement (PMC5379762; doi:10.1186/s12859-017-1550-y), 2017-04-04
Supplement: 12859_2017_1550_MOESM1_ESM.pdf [file 12859_2017_1550_MOESM1_ESM.pdf]

List of supplementary figures:

Figure S1:

**Histograms summarizing the occurrences of Pfam-A functional domains in the human (blue) and MTB (red) proteomes.** Nearly 30 % of the proteins in both species have been assigned more than one domain.

Figure S2:

**Pair-wise comparisons between MTB proteins and their putative orthologs listed in the Integr8 (upper figure), eggNOG (lower left) and KEGG Orthology/KO (lower right) databases.** Note the relatively smaller number of orthologs assigned by Integr8.

Figure S3:

**Using the interolog approach to extend the limited set of DDI templates provided by PDB.** Evolutionarily conserved PPIs (involving orthologs) are assumed to share a common underlying pattern of domain-domain interactions. This allows interacting domains to be inferred for PPIs for which structure information is not directly available (here, A'-B').

Figure S4:

**Diversity in terms of length and sequence composition across the polypeptide sequences assigned to the Ulp1 protease family C-terminal catalytic domain (PF02902).** The scatter plot follows from all-vs-all pairwise sequence alignment using the Smith-Waterman method. Pairs coming from the same proteome (blue) or from different proteomes (cyan) have been assigned different colors.

Figure S5:

**Statistical over-representation of interacting Pfam domain pairs (from iPfam/3DID) in a PPI network for co-localized, coexpressed cytosolic proteins in *E. coli*.** Several domain pairs do not show significant association with the PPI set. The darker horizontal line represents the p-value < 0.05 threshold.

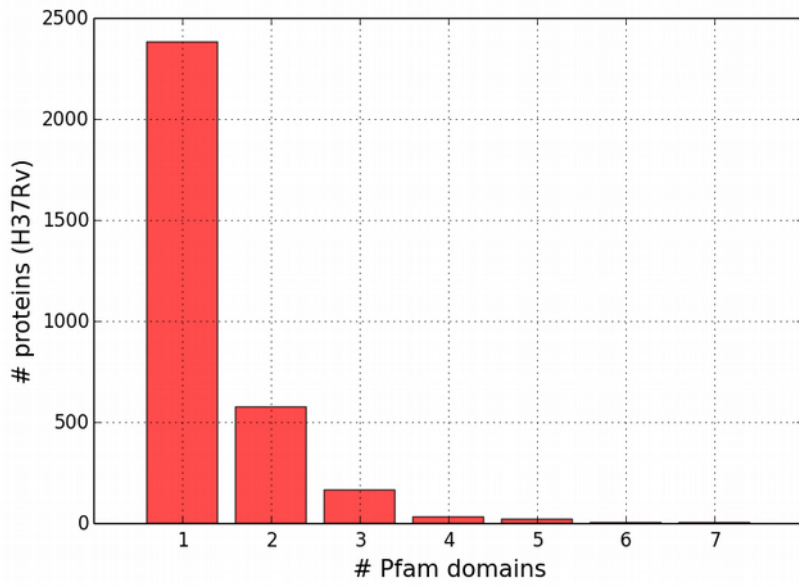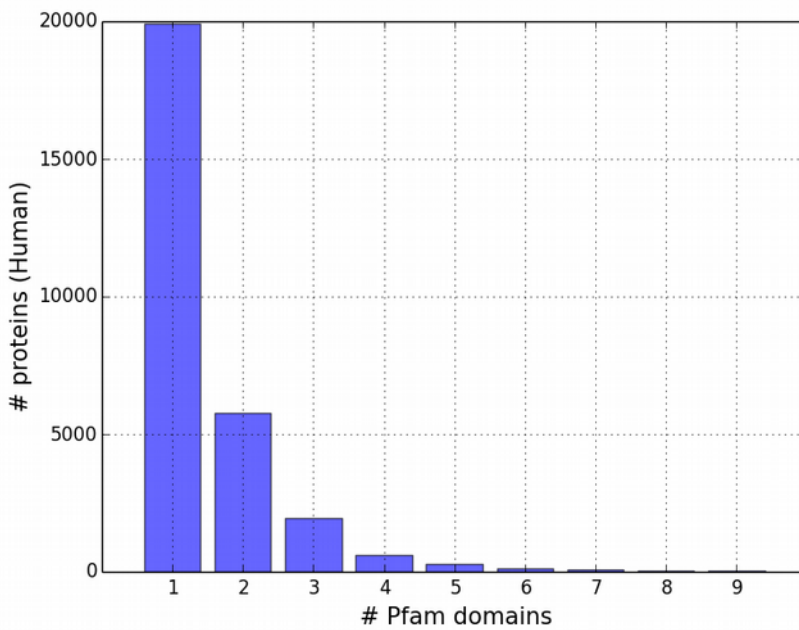

Fig. S1. Histograms summarizing the occurrences of Pfam-A functional domains in the human (blue) and MTB (red) proteomes. Nearly 30 % of the proteins in both species have been assigned more than one domain.

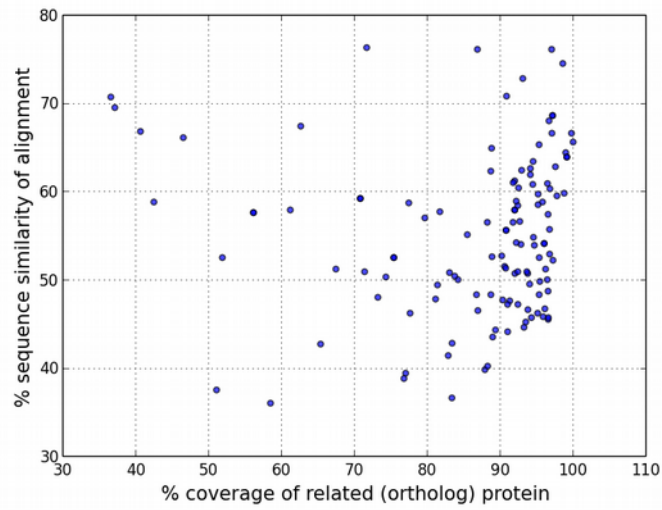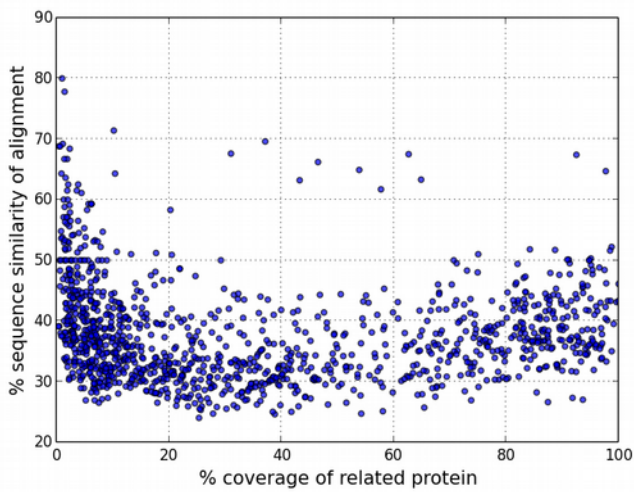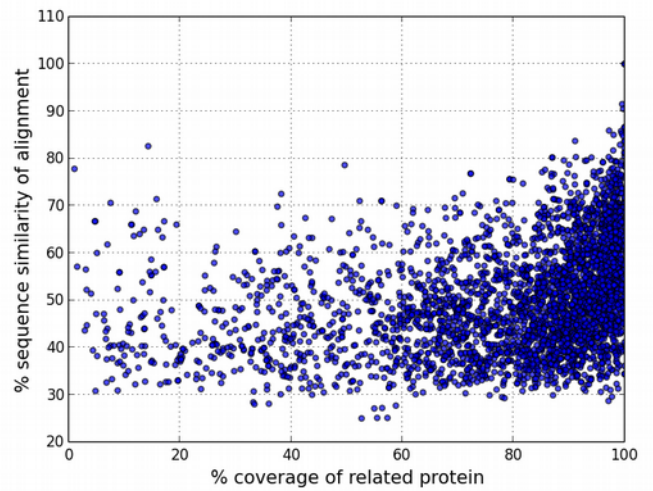

**Fig S2. Pair-wise comparisons between MTB proteins and their putative orthologs listed in the Integr8 (upper figure), eggNOG (lower left) and KEGG Orthology/KO (lower right) databases. Note the relatively smaller number of orthologs assigned by Integr8.**

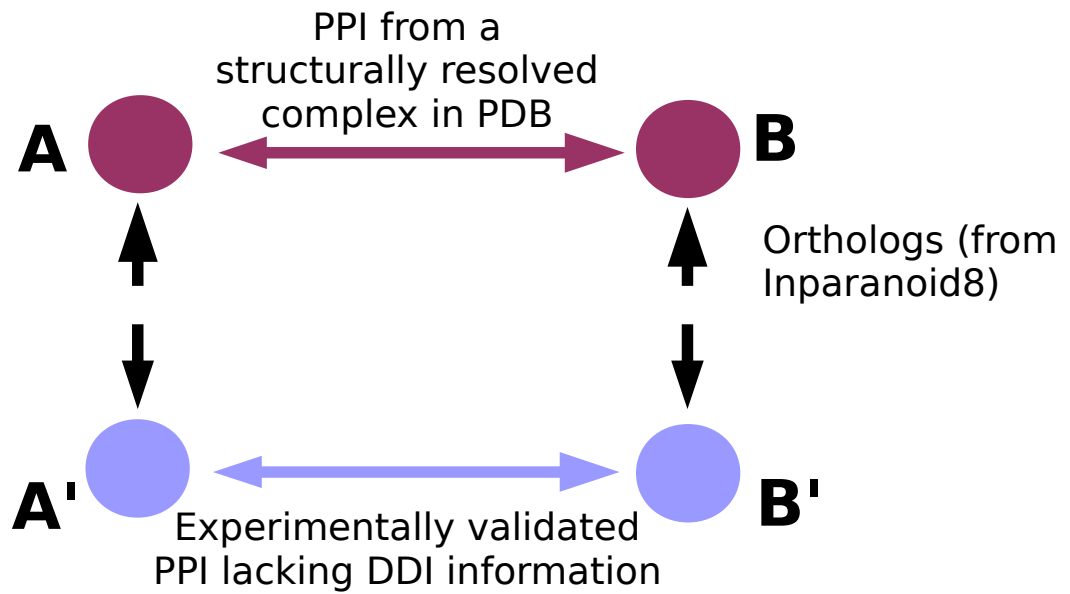

Fig S3. **Using the interolog approach to extend the limited set of DDI templates provided by PDB.** Evolutionarily conserved PPIs (involving orthologs) are assumed to share a common underlying pattern of domain-domain interactions. This allows interacting domains to be inferred for PPIs for which structure information is not directly available (here, A'-B').

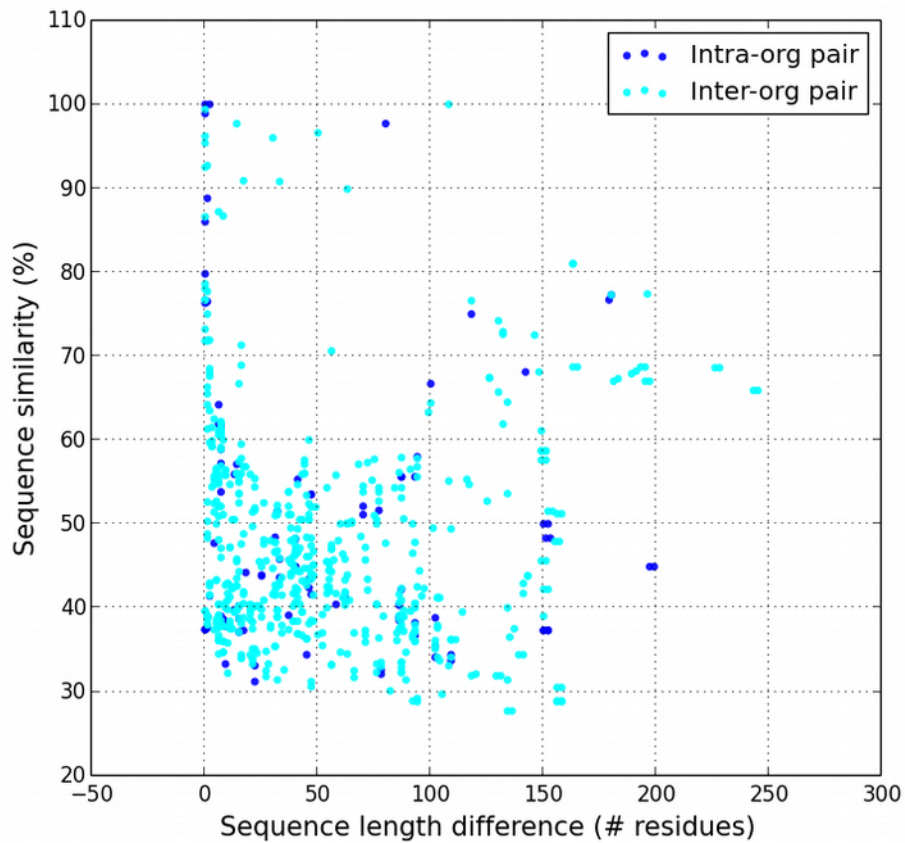

Fig S4. **Diversity in terms of length and sequence composition across the polypeptide sequences assigned to the Ulp1 protease family C-terminal catalytic domain (PF02902).** The scatter plot follows from all-vs-all pairwise sequence alignment using the Smith-Waterman method. Pairs coming from the same proteome (blue) or from different proteomes (cyan) have been assigned different colors.

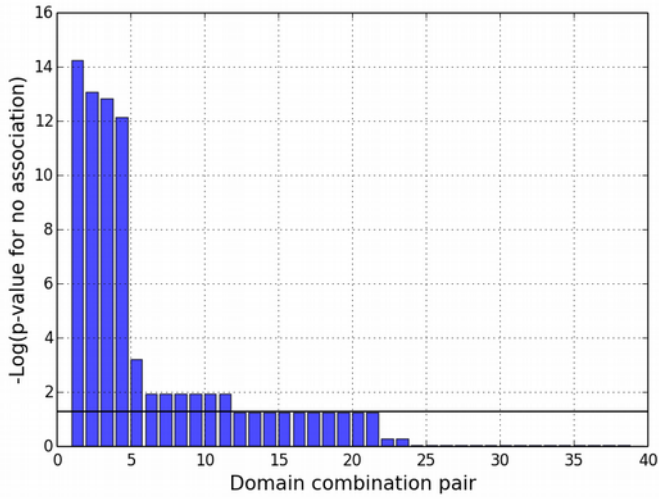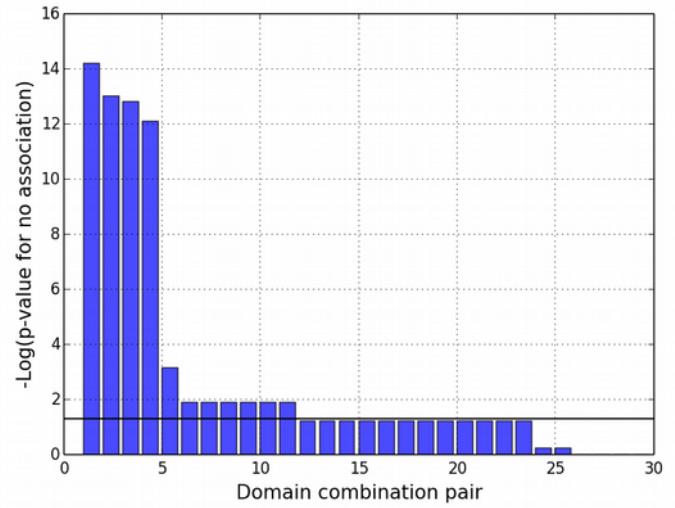

Fig S5. **Statistical over-representation of interacting Pfam domain pairs (from iPfam/3DID) in a PPI network for co-localized, coexpressed cytosolic proteins in *E. coli*.** Several domain pairs do not show significant association with the PPI set. The darker horizontal line represents the p-value < 0.05 threshold.
