# Supplementary material for: Using structural knowledge in the protein data bank to inform the search for potential host-microbe protein interactions in sequence space: application to Mycobacterium tuberculosis
Source: PubMed Central journal article supplement (PMC5379762; doi:10.1186/s12859-017-1550-y), 2017-04-04
Supplement: 12859_2017_1550_MOESM6_ESM.pdf [file 12859_2017_1550_MOESM6_ESM.pdf]

## Summary of comparison of our predictions with previous publications.

We considered the four most recently published computational studies on human-MTB interactions (refs. 20, 32, 33 & 70 in the main text). Of these, two publications (Rapanoel et al. 2013 [20] and Huo et al. 2015 [32]) did not include their full set of predictions, so no comparison could be made. Of the remaining two studies which have made their predictions available, we found no overlap with the predictions of Zhou et al. 2014 [33], but found about a dozen common predictions (at score threshold of 0.75) with the approach of Zhou et al. 2013 [70]. These protein pairs are listed below:

| <b>MTB ACC</b> | <b>Human ACC</b> | <b>MTB protein name(s)</b> | <b>Human protein name(s)</b>   |
|----------------|------------------|----------------------------|--------------------------------|
| 005855         | E7EQG2           | rh1E/Rv3211                | EIF4A2                         |
| 053645         | P08183           | Rv0194                     | ABCB1/MDR1/PYG1                |
| 005855         | P38919           | rh1E/Rv3211                | EIF4A3/DDX48/KIAA0111          |
| 053639         | Q9UJ83           | oxcA/Rv0118c               | HACL1/HPCL/HPCL2/PHYH2/HSPC279 |
| 005855         | Q96A72           | rh1E/Rv3211                | MAGOHB/MAGOH2                  |
| P96890         | P11498           | accA3/Rv3285               | PC                             |
| 005855         | P60842           | rh1E/Rv3211                | EIF4A1/DDX2A/EIF4A             |
| 005855         | O15234           | rh1E/Rv3211                | CASC3/MLN51                    |
| 005855         | Q9HCG8           | rh1E/Rv3211                | CWC22/KIAA1604/NCM             |
| 005855         | P61326           | rh1E/Rv3211                | MAGOH/MAGOHA                   |
| 005855         | Q14240           | rh1E/Rv3211                | EIF4A2/DDX2B/EIF4F             |
| 005855         | J3KT12           | rh1E/Rv3211                | EIF4A1                         |

Limited overlap with these earlier studies may be attributed to differences in the background PPI/DDI databases used, besides differences in the details of the methodologies followed.
